# Supplementary material
Source: PubMed Central journal article supplement (PMC4270121)

## Online Repository Materials

### Genome-Wide Association Study of Lung Function Phenotypes in a Founder Population

#### Table of Contents

|                                                                       | Page |
|-----------------------------------------------------------------------|------|
| Supplementary Tables                                                  |      |
| E1. Air Quality Data for Hutterite Colonies                           | 2    |
| E2. Characteristics of the Non-asthmatic and Asthmatic Sample Subsets | 3    |
| E3. Results of GWAS in Hutterites                                     | 4    |
| E4. Sub-analyses Excluding Asthmatics and Stratified by Age           | 6    |
| E5. Replication of Previous GWAS Results                              | 8    |
| E6. Results of LASSO Regression                                       | 10   |
| Supplementary Figures                                                 |      |
| E1. Measures of Lung Function in Hutterites                           | 13   |
| E2. Regional Association Plots                                        | 14   |

**Table E1.** Air quality data for the 10 Hutterite colonies in South Dakota participating in these studies (from <http://www.homefacts.com/airquality/South-Dakota.html>). These data are gathered from measuring stations across the country. A higher number (on a scale of 1-10) reflects fewer amounts of pollutants (i.e., a 9.0 means that 90% of the stations around the country are measuring higher amounts than the local station). The six air pollutants reported are carbon monoxide, ozone, particulate matter (PM) 10, PM 2.5, and sulfur dioxide. The range of values for the six pollutants and overall ratings are shown. Values for the individual pollutants can be found at the above website.

| Zip Code | Number of colonies at this zip code | Range of air quality values | Overall air quality | Overall Rating |
|----------|-------------------------------------|-----------------------------|---------------------|----------------|
| 57042    | 1                                   | 5.0-9.9                     | 9.2                 | Outstanding    |
| 57076    | 1                                   | 5.7-9.9                     | 9.2                 | Outstanding    |
| 57301    | 2                                   | 6.8-9.9                     | 9.6                 | Outstanding    |
| 57311    | 2                                   | 6.8-9.9                     | 9.6                 | Outstanding    |
| 57314    | 1                                   | 5.0-9.9                     | 9.2                 | Outstanding    |
| 57334    | 1                                   | 6.8-9.9                     | 9.2                 | Outstanding    |
| 57334    | 1                                   | 6.8-9.9                     | 9.6                 | Outstanding    |
| 57366    | 1                                   | 6.8-9.9                     | 9.6                 | Outstanding    |

**Table E2.** Characteristics of the Non-asthmatic and Asthmatic Sample Subsets.

|                                                         | Males           |                 | Females         |                 |
|---------------------------------------------------------|-----------------|-----------------|-----------------|-----------------|
|                                                         | 6-17 years      | > 17 years      | 6-17 years      | > 17 years      |
| <b>Asthmatics</b>                                       |                 |                 |                 |                 |
| <b>Sample Size</b>                                      | 25              | 48              | 38              | 51              |
| <b>Number with atopy (%)</b>                            | 13 (52.0%)      | 34 (70.8%)      | 20 (52.6%)      | 24 (47.1%)      |
| <b>Mean age <math>\pm</math> SD (yr)</b>                | 10.8 $\pm$ 3.2  | 39.4 $\pm$ 14.6 | 12.0 $\pm$ 2.9  | 38.2 $\pm$ 15.6 |
| <b>Mean FEV<sub>1</sub> <math>\pm</math> SD (L)</b>     | 2.28 $\pm$ 0.92 | 3.76 $\pm$ 0.78 | 2.56 $\pm$ 0.81 | 2.80 $\pm$ 0.53 |
| <b>Mean FVC <math>\pm</math> SD (L)</b>                 | 2.75 $\pm$ 1.13 | 5.03 $\pm$ 0.90 | 2.93 $\pm$ 0.95 | 3.64 $\pm$ 0.70 |
| <b>Mean FEV<sub>1</sub>/FVC <math>\pm</math> SD (%)</b> | 83.5 $\pm$ 7.1  | 74.9 $\pm$ 7.5  | 87.8 $\pm$ 6.7  | 77.2 $\pm$ 8.0  |
| <b>Non-asthmatics</b>                                   |                 |                 |                 |                 |
| <b>Sample Size</b>                                      | 155             | 303             | 157             | 367             |
| <b>Number with atopy (%)</b>                            | 63 (40.6%)      | 157 (51.8%)     | 73 (46.5%)      | 170 (46.3%)     |
| <b>Mean age <math>\pm</math> SD (yr)</b>                | 11.5 $\pm$ 3.2  | 40.2 $\pm$ 15.4 | 12.2 $\pm$ 2.9  | 39.8 $\pm$ 15.6 |
| <b>Mean FEV<sub>1</sub> <math>\pm</math> SD (L)</b>     | 2.65 $\pm$ 1.06 | 3.92 $\pm$ 0.77 | 2.56 $\pm$ 0.77 | 2.96 $\pm$ 0.60 |
| <b>Mean FVC <math>\pm</math> SD (L)</b>                 | 3.08 $\pm$ 1.31 | 4.89 $\pm$ 0.91 | 2.85 $\pm$ 0.90 | 3.61 $\pm$ 0.70 |
| <b>Mean FEV<sub>1</sub>/FVC <math>\pm</math> SD (%)</b> | 87.3 $\pm$ 7.5  | 80.4 $\pm$ 7.6  | 90.0 $\pm$ 6.3  | 82.1 $\pm$ 6.8  |

**Table E3.** SNPs associated with lung function at  $P < 10^{-5}$  in the Hutterites.  $P$ -values highlighted in bold exceeded the threshold for Bonferroni-corrected genome-wide significance ( $P < 2.0 \times 10^{-7}$ ). MAF, minor allele frequency.

| SNP        | Chr. | NCBI36 Position | Gene            | SNP-Gene Relationship | Major/Minor Allele | MAF  | FEV <sub>1</sub> /FVC<br>$P$ | FEV <sub>1</sub><br>$P$ | FVC<br>$P$ |
|------------|------|-----------------|-----------------|-----------------------|--------------------|------|------------------------------|-------------------------|------------|
| rs10864907 | 2    | 113,400,346     | <i>IL37</i>     | 7.4k downstream       | G/A                | 0.44 | 1.5E-01                      | 6.7E-06                 | 3.9E-04    |
| rs2637260  | 10   | 77,990,352      | <i>C10orf11</i> | 3.2k downstream       | T/C                | 0.44 | 7.5E-06                      | 1.4E-01                 | 3.9E-01    |
| rs2637261  | 10   | 77,990,599      | <i>C10orf11</i> | 3.5k downstream       | G/A                | 0.44 | 7.5E-06                      | 1.4E-01                 | 3.9E-01    |
| rs2637266  | 10   | 78,001,324      | <i>C10orf11</i> | 14.2k downstream      | T/C                | 0.44 | 2.0E-06                      | 1.1E-01                 | 4.2E-01    |
| rs10824425 | 10   | 78,010,316      | <i>C10orf11</i> | 23.2k downstream      | C/G                | 0.44 | 8.2E-06                      | 1.1E-01                 | 4.7E-01    |
| rs11856830 | 15   | 68,211,555      | <i>TLE3</i>     | 34.2k upstream        | A/G                | 0.40 | 3.2E-06                      | 1.6E-01                 | 8.7E-01    |
| rs2114719  | 15   | 68,720,392      | <i>UACA</i>     | 13.6k downstream      | G/A                | 0.12 | 4.2E-07                      | 6.9E-04                 | 2.5E-01    |
| rs2162555  | 15   | 68,720,626      | <i>UACA</i>     | 13.3k downstream      | G/A                | 0.12 | 5.7E-07                      | 2.2E-04                 | 1.6E-01    |
| rs6494886  | 15   | 68,720,785      | <i>UACA</i>     | 13.2k downstream      | C/A                | 0.12 | 3.9E-07                      | 1.2E-03                 | 2.5E-01    |
| rs2162556  | 15   | 68,723,492      | <i>UACA</i>     | 10.5k downstream      | C/T                | 0.12 | 4.2E-07                      | 6.9E-04                 | 2.5E-01    |
| rs1991088  | 15   | 68,791,504      | <i>UACA</i>     | intron                | C/T                | 0.18 | 1.2E-06                      | 3.8E-02                 | 8.6E-01    |
| rs1477439  | 15   | 68,821,634      | <i>UACA</i>     | intron                | G/C                | 0.28 | 5.3E-06                      | 1.3E-01                 | 5.4E-01    |
| rs4777305  | 15   | 68,832,522      | <i>UACA</i>     | intron                | T/C                | 0.18 | 1.5E-06                      | 2.5E-02                 | 8.1E-01    |
| rs11633212 | 15   | 69,387,305      | <i>THSD4</i>    | intron                | A/G                | 0.33 | 3.8E-06                      | 1.6E-01                 | 6.4E-01    |
| rs17786786 | 15   | 69,395,673      | <i>THSD4</i>    | intron                | A/C                | 0.27 | <b>4.2E-08</b>               | 1.6E-01                 | 4.2E-01    |
| rs6494904  | 15   | 69,396,576      | <i>THSD4</i>    | intron                | T/C                | 0.25 | <b>1.4E-08</b>               | 5.8E-02                 | 5.9E-01    |
| rs11855326 | 15   | 69,397,889      | <i>THSD4</i>    | intron                | G/A                | 0.25 | <b>2.5E-08</b>               | 5.4E-02                 | 6.6E-01    |
| rs1837762  | 15   | 69,399,357      | <i>THSD4</i>    | intron                | C/T                | 0.11 | <b>5.7E-08</b>               | 1.7E-03                 | 4.5E-01    |
| rs11858540 | 15   | 69,409,840      | <i>THSD4</i>    | intron                | T/G                | 0.12 | 3.0E-07                      | 1.5E-02                 | 7.4E-01    |
| rs1441361  | 15   | 69,412,176      | <i>THSD4</i>    | intron                | A/G                | 0.12 | 2.8E-07                      | 1.5E-02                 | 7.3E-01    |
| rs1568010  | 15   | 69,455,566      | <i>THSD4</i>    | intron                | T/G                | 0.44 | 7.6E-06                      | 3.8E-01                 | 5.8E-02    |
| rs11858454 | 15   | 69,456,169      | <i>THSD4</i>    | intron                | C/T                | 0.44 | 5.3E-06                      | 3.8E-01                 | 6.1E-02    |
| rs8033889  | 15   | 69,467,134      | <i>THSD4</i>    | intron                | G/T                | 0.25 | 2.3E-07                      | 4.4E-03                 | 3.3E-01    |
| rs4531689  | 15   | 69,476,033      | <i>THSD4</i>    | intron                | C/T                | 0.46 | 4.8E-06                      | 5.0E-01                 | 5.4E-02    |
| rs4288952  | 15   | 69,477,937      | <i>THSD4</i>    | intron                | G/A                | 0.45 | 4.6E-06                      | 4.6E-01                 | 4.8E-02    |

|            |    |            |                |                  |     |      |                |         |         |
|------------|----|------------|----------------|------------------|-----|------|----------------|---------|---------|
| rs12441227 | 15 | 69,483,940 | <i>THSD4</i>   | intron           | T/C | 0.22 | <b>3.4E-09</b> | 2.2E-03 | 3.7E-01 |
| rs712046   | 17 | 31,382,410 | <i>CCL23</i>   | 13.3k upstream   | G/A | 0.32 | 3.2E-07        | 8.2E-02 | 5.0E-01 |
| rs854679   | 17 | 31,382,952 | <i>CCL23</i>   | 13.8k upstream   | G/T | 0.32 | 3.4E-07        | 8.9E-02 | 5.2E-01 |
| rs854674   | 17 | 31,384,085 | <i>CCL23</i>   | 15.0k upstream   | T/C | 0.32 | 6.8E-07        | 1.3E-01 | 4.6E-01 |
| rs2017854  | 17 | 62,918,483 | <i>PITPNC1</i> | intron           | G/C | 0.41 | 2.6E-06        | 5.2E-01 | 8.5E-04 |
| rs4799710  | 18 | 29520739   | <i>ASXL3</i>   | intron           | A/G | 0.32 | 2.8E-01        | 6.4E-04 | 6.7E-06 |
| rs2835345  | 21 | 36,723,304 | <i>CHAF1B</i>  | 12.3k downstream | G/T | 0.25 | 8.3E-06        | 1.1E-01 | 4.9E-01 |

**Table E4.** Results of analyses of FEV<sub>1</sub>/FVC in combined sample, in sample excluding asthmatics (non-asthmatics), and in analyses stratified by age. All SNPs with *P*-value < 10<sup>-5</sup> in the combined sample are shown.

| SNP        | Chr. | NCBI36<br>Position | Combined<br>sample |          | Non-asthmatics |          | Asthmatics |          | Adults<br>(>17 years) |          | Children<br>(≤17 years) |          |
|------------|------|--------------------|--------------------|----------|----------------|----------|------------|----------|-----------------------|----------|-------------------------|----------|
|            |      |                    | N                  | <i>P</i> | N              | <i>P</i> | N          | <i>P</i> | N                     | <i>P</i> | N                       | <i>P</i> |
| rs2637260  | 10   | 77,990,352         | 1106               | 7.50E-06 | 949            | 6.34E-07 | 157        | 9.82E-01 | 760                   | 2.70E-04 | 346                     | 2.69E-02 |
| rs2637261  | 10   | 77,990,599         | 1106               | 7.50E-06 | 949            | 6.34E-07 | 157        | 9.82E-01 | 760                   | 2.70E-04 | 346                     | 2.69E-02 |
| rs2637266  | 10   | 78,001,324         | 1065               | 2.00E-06 | 916            | 2.43E-07 | 149        | 8.31E-01 | 722                   | 4.22E-05 | 343                     | 3.38E-02 |
| rs10824425 | 10   | 78,010,316         | 1099               | 8.23E-06 | 943            | 8.98E-07 | 156        | 9.99E-01 | 753                   | 3.34E-04 | 346                     | 2.58E-02 |
| rs11856830 | 15   | 68,211,555         | 1055               | 3.17E-06 | 905            | 2.41E-04 | 150        | 1.42E-01 | 713                   | 1.87E-03 | 342                     | 1.40E-03 |
| rs2114719  | 15   | 68,720,392         | 1106               | 4.15E-07 | 949            | 2.97E-05 | 157        | 1.93E-02 | 760                   | 5.56E-05 | 346                     | 1.98E-02 |
| rs2162555  | 15   | 68,720,626         | 1095               | 5.68E-07 | 940            | 3.74E-05 | 155        | 2.38E-02 | 750                   | 4.62E-05 | 345                     | 2.38E-02 |
| rs6494886  | 15   | 68,720,785         | 1092               | 3.87E-07 | 938            | 1.50E-05 | 154        | 4.28E-02 | 750                   | 6.07E-05 | 342                     | 2.58E-02 |
| rs2162556  | 15   | 68,723,492         | 1106               | 4.15E-07 | 949            | 2.97E-05 | 157        | 1.93E-02 | 760                   | 5.56E-05 | 346                     | 1.98E-02 |
| rs1991088  | 15   | 68,791,504         | 1097               | 1.18E-06 | 941            | 1.72E-04 | 156        | 1.64E-03 | 753                   | 3.87E-04 | 344                     | 5.35E-03 |
| rs1477439  | 15   | 68,821,634         | 1101               | 5.34E-06 | 945            | 1.18E-03 | 156        | 9.70E-03 | 757                   | 4.63E-03 | 344                     | 5.08E-04 |
| rs4777305  | 15   | 68,832,522         | 1100               | 1.47E-06 | 944            | 1.60E-04 | 156        | 3.22E-03 | 754                   | 6.59E-04 | 346                     | 4.03E-03 |
| rs11633212 | 15   | 69,387,305         | 1103               | 3.80E-06 | 946            | 5.33E-04 | 157        | 7.29E-05 | 757                   | 1.22E-04 | 346                     | 2.31E-02 |
| rs17786786 | 15   | 69,395,673         | 1100               | 4.23E-08 | 944            | 1.28E-05 | 156        | 7.28E-05 | 757                   | 1.08E-05 | 343                     | 1.09E-02 |
| rs6494904  | 15   | 69,396,576         | 1105               | 1.43E-08 | 948            | 3.64E-06 | 157        | 1.57E-04 | 759                   | 3.23E-06 | 346                     | 9.91E-03 |
| rs11855326 | 15   | 69,397,889         | 1104               | 2.47E-08 | 947            | 6.12E-06 | 157        | 1.57E-04 | 758                   | 6.08E-06 | 346                     | 9.91E-03 |
| rs1837762  | 15   | 69,399,357         | 1104               | 5.65E-08 | 947            | 5.42E-06 | 157        | 2.36E-02 | 758                   | 4.17E-05 | 346                     | 1.59E-02 |
| rs11858540 | 15   | 69,409,840         | 1106               | 2.98E-07 | 949            | 3.44E-05 | 157        | 1.26E-02 | 760                   | 2.05E-04 | 346                     | 2.12E-02 |
| rs1441361  | 15   | 69,412,176         | 1105               | 2.76E-07 | 948            | 3.06E-05 | 157        | 1.26E-02 | 759                   | 1.95E-04 | 346                     | 2.12E-02 |
| rs1568010  | 15   | 69,455,566         | 1102               | 7.56E-06 | 946            | 3.10E-04 | 156        | 1.45E-01 | 757                   | 3.08E-05 | 345                     | 1.15E-01 |
| rs11858454 | 15   | 69,456,169         | 1106               | 5.26E-06 | 949            | 2.26E-04 | 157        | 1.38E-01 | 760                   | 2.87E-05 | 346                     | 1.04E-01 |
| rs8033889  | 15   | 69,467,134         | 1103               | 2.31E-07 | 946            | 3.56E-05 | 157        | 1.08E-03 | 757                   | 1.89E-05 | 346                     | 2.07E-03 |
| rs4531689  | 15   | 69,476,033         | 1104               | 4.77E-06 | 947            | 3.87E-04 | 157        | 1.05E-01 | 759                   | 5.60E-05 | 345                     | 4.50E-02 |
| rs4288952  | 15   | 69,477,937         | 1099               | 4.58E-06 | 942            | 2.60E-04 | 157        | 1.03E-01 | 755                   | 3.51E-05 | 344                     | 8.37E-02 |

|            |    |            |      |          |     |          |     |          |     |          |     |          |
|------------|----|------------|------|----------|-----|----------|-----|----------|-----|----------|-----|----------|
| rs12441227 | 15 | 69,483,940 | 1091 | 3.38E-09 | 36  | 2.79E-06 | 155 | 2.05E-03 | 746 | 4.70E-06 | 345 | 5.86E-04 |
| rs712046   | 17 | 31,382,410 | 1104 | 3.20E-07 | 947 | 7.23E-05 | 157 | 4.37E-02 | 759 | 6.73E-05 | 345 | 6.27E-03 |
| rs854679   | 17 | 31,382,952 | 1097 | 3.40E-07 | 941 | 5.66E-05 | 156 | 6.64E-02 | 751 | 6.21E-05 | 346 | 7.38E-03 |
| rs854674   | 17 | 31,384,085 | 1098 | 6.77E-07 | 941 | 9.55E-05 | 157 | 5.44E-02 | 752 | 1.39E-04 | 346 | 6.92E-03 |
| rs2017854  | 17 | 62,918,483 | 1105 | 2.58E-06 | 948 | 3.87E-05 | 157 | 1.48E-03 | 759 | 1.63E-05 | 346 | 1.19E-02 |
| rs2835345  | 21 | 36,723,304 | 1103 | 8.29E-06 | 947 | 1.92E-04 | 156 | 3.39E-03 | 758 | 2.45E-03 | 345 | 5.70E-03 |

**Table E5.** Evidence for associations with lung function in the Hutterites for the 27 previously reported lung function associated loci. If the reported SNP was not genotyped in the Hutterites, a surrogate SNP with the strongest LD to the reported SNP and the amount of LD in HapMap ( $r^2$ ) are shown. One SNP, rs12447804, did not have any surrogate SNPs in the Hutterites. Other SNPs at the same locus with  $P < 0.01$  in the Hutterites are shown in the last column. SNPs replicated at  $P < 0.05$  are shown in bold font.

| Chr. | NCBI36 Position    | Reported SNP      | Reported Locus                           | Reported phenotype         | Tested SNP        | NCBI36 Position    | HapMap $r^2$ | FEV <sub>1</sub> /FVC $P$ | FEV <sub>1</sub> $P$ | FVC $P$         | Other SNPs at Locus with $P < 0.01$                         |
|------|--------------------|-------------------|------------------------------------------|----------------------------|-------------------|--------------------|--------------|---------------------------|----------------------|-----------------|-------------------------------------------------------------|
| 1    | 17,051,981         | rs2284746         | <i>MFAP2</i>                             | FEV <sub>1</sub> /FVC      | rs7545518         | 17,374,742         | 0.574        | 8.25E-01                  | 9.74E-01             | 6.60E-01        |                                                             |
| 1    | 215,248,463        | rs993925          | <i>TGFB2</i>                             | FEV <sub>1</sub> /FVC      | rs642836          | 219,023,654        | 0.203        | 5.54E-01                  | 4.65E-01             | 1.78E-01        | rs1018040<br>(9.29E-03, FVC)                                |
| 2    | 218,508,660        | rs2571445         | <i>TNS1</i>                              | FEV <sub>1</sub>           | rs3796028         | 218,695,102        | 0.530        | 7.22E-01                  | 1.13E-01             | 9.09E-02        |                                                             |
| 2    | 229,336,434        | rs1435867         | <i>PID1</i>                              | FEV <sub>1</sub> /FVC      | rs373 2192        | 229,592,304        | 1            | 5.18E-02                  | 1.33E-01             | 5.11E-01        |                                                             |
|      | 229,328,008        | rs10498230        | <i>PID1</i>                              | FEV <sub>1</sub> /FVC      | rs10498230        | 229,328,008        | 1            | 5.51E-01                  | 5.01E-01             | 6.96E-01        |                                                             |
| 2    | <b>239,613,402</b> | <b>rs12477314</b> | <b><i>HDAC4</i></b>                      | <b>FEV<sub>1</sub>/FVC</b> | <b>rs12712295</b> | <b>239,914,718</b> | <b>0.281</b> | <b>3.04E-02</b>           | <b>4.59E-01</b>      | <b>7.20E-01</b> | <b>rs10186131</b><br><b>(5.27E-03, FEV<sub>1</sub>/FVC)</b> |
| 3    | <b>25,495,586</b>  | <b>rs1529672</b>  | <b><i>RARB</i></b>                       | <b>FEV<sub>1</sub>/FVC</b> | <b>rs1153582</b>  | <b>25,543,275</b>  | <b>0.928</b> | <b>1.37E-02</b>           | <b>7.66E-01</b>      | <b>3.31E-01</b> | <b>rs2116703</b><br><b>(2.23E-03, FEV<sub>1</sub>)</b>      |
| 3    | <b>170,782,921</b> | <b>rs1344555</b>  | <b><i>MECOM</i></b>                      | <b>FEV<sub>1</sub></b>     | <b>rs10513678</b> | <b>169,312,833</b> | <b>0.504</b> | <b>5.77E-03</b>           | <b>5.57E-01</b>      | <b>3.76E-02</b> | <b>rs6444855</b><br><b>(3.68E-04, FVC)</b>                  |
| 4    | 90,226,510         | rs2869967         | <i>FAM13A</i>                            | FEV <sub>1</sub> /FVC      | rs6849143         | 89,928,489         | 0.743        | 4.91E-01                  | 6.75E-01             | 7.72E-01        |                                                             |
|      | 90,134,259         | rs6830970         | <i>FAM13A</i>                            | FEV <sub>1</sub> /FVC      | rs6852928         | 89,926,193         | 0.468        | 5.87E-01                  | 8.17E-01             | 6.36E-01        |                                                             |
| 4    | <b>107,046,508</b> | <b>rs10516526</b> | <b><i>FLJ20184-INTS12-GSTCD-NPNT</i></b> | <b>FEV<sub>1</sub></b>     | <b>rs11726124</b> | <b>106,766,496</b> | <b>1</b>     | <b>6.52E-01</b>           | <b>1.23E-02</b>      | <b>7.62E-02</b> |                                                             |
|      | <b>107,165,711</b> | <b>rs17331332</b> | <b><i>FLJ20184-INTS12-GSTCD-NPNT</i></b> | <b>FEV<sub>1</sub></b>     | <b>rs7693333</b>  | <b>107,047,594</b> | <b>0.004</b> | <b>7.30E-01</b>           | <b>3.85E-02</b>      | <b>2.85E-01</b> |                                                             |
|      | 107,154,433        | rs17036341        | <i>FLJ20184-INTS12-GSTCD-NPNT</i>        | FEV <sub>1</sub>           | rs10021819        | 106,895,614        | 0.118        | 1.05E-01                  | 9.86E-02             | 5.15E-01        |                                                             |
|      | <b>106,976,744</b> | <b>rs11727189</b> | <b><i>FLJ20184-INTS12-</i></b>           | <b>FEV<sub>1</sub></b>     | <b>rs11097903</b> | <b>106,866,077</b> | <b>0.004</b> | <b>5.79E-01</b>           | <b>1.56E-01</b>      | <b>1.53E-02</b> |                                                             |



|          |                    |                   | <b>GSTCD-NPNT</b>                        |                                                 |                   |                    |              |                 |                 |                 |                                            |
|----------|--------------------|-------------------|------------------------------------------|-------------------------------------------------|-------------------|--------------------|--------------|-----------------|-----------------|-----------------|--------------------------------------------|
|          | 106,951,178        | rs17036090        | <i>FLJ20184-INTS12-GSTCD-NPNT</i>        | FEV <sub>1</sub>                                | rs10470990        | 106,821,578        | 0.159        | 7.16E-01        | 3.81E-01        | 7.08E-02        |                                            |
|          | 106,920,983        | rs17036052        | <i>FLJ20184-INTS12-GSTCD-NPNT</i>        | FEV <sub>1</sub>                                | rs17036076        | 106,575,269        | 0.702        | 2.43E-01        | 1.67E-02        | 1.96E-01        |                                            |
|          | <b>106,889,450</b> | <b>rs17035960</b> | <b><i>FLJ20184-INTS12-GSTCD-NPNT</i></b> | <b>FEV<sub>1</sub></b>                          | <b>rs17036090</b> | <b>106,593,574</b> | <b>1</b>     | <b>2.43E-01</b> | <b>1.60E-02</b> | <b>1.89E-01</b> |                                            |
|          | 107,087,537        | rs11097901        | <i>FLJ20184-INTS12-GSTCD-NPNT</i>        | FEV <sub>1</sub>                                | rs11728716        | 106,755,996        | 1            | 6.12E-01        | 6.00E-02        | 2.49E-01        |                                            |
|          | <b>107,113,600</b> | <b>rs11728716</b> | <b><i>FLJ20184-INTS12-GSTCD-NPNT</i></b> | <b>FEV<sub>1</sub></b>                          | <b>rs11726124</b> | <b>106,766,496</b> | <b>1</b>     | <b>6.52E-01</b> | <b>1.23E-02</b> | <b>7.62E-02</b> |                                            |
| <b>4</b> | <b>145,793,929</b> | <b>rs12504628</b> | <b><i>HHIP</i></b>                       | <b>FEV<sub>1</sub>/FVC,<br/>FEV<sub>1</sub></b> | <b>rs13147758</b> | <b>145,460,230</b> | <b>0.965</b> | <b>2.46E-02</b> | <b>7.28E-01</b> | <b>5.27E-01</b> |                                            |
|          | <b>145,843,343</b> | <b>rs1980057</b>  | <b><i>HHIP</i></b>                       | <b>FEV<sub>1</sub>/FVC</b>                      | <b>rs1980057</b>  | <b>145,843,343</b> | <b>1</b>     | <b>2.46E-02</b> | <b>7.28E-01</b> | <b>5.27E-01</b> |                                            |
|          | <b>145,792,189</b> | <b>rs1032295</b>  | <b><i>HHIP</i></b>                       | <b>FEV<sub>1</sub>/FVC</b>                      | <b>rs13147758</b> | <b>145,460,230</b> | <b>0.743</b> | <b>2.46E-02</b> | <b>7.28E-01</b> | <b>5.27E-01</b> |                                            |
| 5        | 95,062,456         | rs153916          | <i>SPATA9</i>                            | FEV <sub>1</sub> /FVC                           | rs153916          | 95,062,456         | 1            | 2.50E-01        | 6.47E-01        | 3.19E-01        |                                            |
| 5        | 147,822,546        | rs11168048        | <i>HTR4</i>                              | FEV <sub>1</sub> /FVC                           | rs7735184         | 147,822,546        | 0.930        | 5.20E-01        | 2.55E-01        | 3.36E-01        | rs6861078<br>(2.94E-03, FEV <sub>1</sub> ) |
|          | 147,824,585        | rs7735184         | <i>HTR4</i>                              | FEV <sub>1</sub> /FVC                           | rs7735184         | 147,824,585        | 1            | 5.20E-01        | 2.55E-01        | 3.36E-01        |                                            |
|          | 147,826,008        | rs3995090         | <i>HTR4</i>                              | FEV <sub>1</sub>                                | rs3995090         | 147,826,008        | 1            | 9.3E-01         | 1.38E-01        | 2.50E-01        |                                            |
|          | 147,826,900        | rs6889822         | <i>HTR4</i>                              | FEV <sub>1</sub>                                | rs6889822         | 147,826,900        | 1            | 4.36E-01        | 3.3E-01         | 4.33E-01        |                                            |
| 5        | 156,864,954        | rs2277027         | <i>ADAM19</i>                            | FEV <sub>1</sub> /FVC                           | rs1422795         | 156,936,364        | 1            | 7.83E-01        | 4.06E-01        | 2.02E-01        | rs9313633<br>(3.07E-03, FVC)               |
|          | 156,868,942        | rs1422795         | <i>ADAM19</i>                            | FEV <sub>1</sub> /FVC                           | rs1422795         | 156,868,942        | 1            | 7.83E-01        | 4.06E-01        | 2.02E-01        |                                            |
| 6        | 28,430,275         | rs6903823         | <i>ZKSCAN3/ZNF323</i>                    | FEV <sub>1</sub>                                | rs6922111         | 28,325,308         | 0.945        | 7.46E-01        | 4.97E-01        | 2.98E-01        |                                            |
| 6        | 31,676,448         | rs2857595         | <i>NCR3</i>                              | FEV <sub>1</sub> /FVC                           | rs2857595         | 31,676,448         | 1            | 6.17E-01        | 9.31E-01        | 7.84E-01        |                                            |
| 6        | 32,259,421         | rs2070600         | <i>PPT2-AGER-NOTCH4</i>                  | FEV <sub>1</sub> /FVC                           | rs206015          | 32,182,759         | 0.649        | 8.48E-01        | 2.31E-01        | 1.87E-01        |                                            |
|          | <b>32,232,402</b>  | <b>rs10947233</b> | <b><i>PPT2-AGER-NOTCH4</i></b>           | <b>FEV<sub>1</sub>/FVC</b>                      | <b>rs10947233</b> | <b>32,232,402</b>  | <b>1</b>     | <b>2.42E-01</b> | <b>1.45E-01</b> | <b>8.64E-03</b> |                                            |
| <b>6</b> | <b>109,374,743</b> | <b>rs2798641</b>  | <b><i>ARMC2</i></b>                      | <b>FEV<sub>1</sub>/FVC</b>                      | <b>rs2798641</b>  | <b>109,374,743</b> |              | <b>2.22E-03</b> | <b>8.37E-01</b> | <b>2.15E-01</b> | <b>rs6904998<br/>(3.25E-03, FVC)</b>       |
| 6        | 142,792,209        | rs3817928         | <i>GPR126</i>                            | FEV <sub>1</sub> /FVC                           | rs6906468         | 142,769,386        | 1            | 1.59E-01        | 6.80E-01        | 8.07E-01        |                                            |
|          | 142,818,757        | rs7776375         | <i>GPR126</i>                            | FEV <sub>1</sub> /FVC                           | rs595184          | 143,012,314        | 0.147        | 4.47E-01        | 7.77E-01        | 8.55E-01        |                                            |
|          | 142,748,826        | rs6937121         | <i>GPR126</i>                            | FEV <sub>1</sub> /FVC                           | rs6937121         | 142,748,826        | 1            | 1.60E-01        | 6.47E-01        | 2.88E-01        |                                            |

|           |                   |                   |                        |                                            |                   |                   |              |                 |                 |                 |                                                                                      |
|-----------|-------------------|-------------------|------------------------|--------------------------------------------|-------------------|-------------------|--------------|-----------------|-----------------|-----------------|--------------------------------------------------------------------------------------|
|           | 142,733,242       | rs11155242        | <i>GPR126</i>          | FEV <sub>1</sub> /FVC                      | rs6906468         | 142,769,386       | 1            | 1.59E-01        | 6.80E-01        | 8.07E-01        |                                                                                      |
| 9         | 95,310,563        | rs16909898        | <i>PTCH1</i>           | FEV <sub>1</sub> /FVC                      | rs10512249        | 98,256,309        | 1            | 3.00E-01        | 4.54E-01        | 3.29E-01        |                                                                                      |
|           | 95,335,864        | rs10512249        | <i>PTCH1</i>           | FEV <sub>1</sub> /FVC                      | rs10512249        | 95,335,864        | 1            | 3.00E-01        | 4.54E-01        | 3.29E-01        |                                                                                      |
| 10        | 12,317,998        | rs7068966         | <i>CDC123</i>          | FEV <sub>1</sub> /FVC,<br>FEV <sub>1</sub> | rs7068966         | 12,317,998        | 1            | 5.98E-01        | 8.57E-01        | 7.36E-01        |                                                                                      |
| <b>10</b> | <b>77,985,230</b> | <b>rs11001819</b> | <b><i>C10orf11</i></b> | <b>FEV<sub>1</sub></b>                     | <b>rs2256413</b>  | <b>78,315,334</b> | <b>0.755</b> | <b>4.67E-04</b> | <b>3.62E-01</b> | <b>5.40E-01</b> | <b>rs2637266<br/>(2.00E-06, FEV<sub>1</sub>/FVC)</b>                                 |
| 12        | 55,813,550        | rs11172113        | <i>LRP1</i>            | FEV <sub>1</sub> /FVC                      | rs1466535         | 57,534,470        | 0.721        | 5.31E-01        | 5.70E-02        | 5.26E-02        |                                                                                      |
| 12        | 94,773,896        | rs1036429         | <i>CCDC38</i>          | FEV <sub>1</sub> /FVC                      | rs4762637         | 96,282,655        | 0.691        | 4.79E-01        | 9.81E-01        | 3.41E-01        |                                                                                      |
| <b>15</b> | <b>69,432,174</b> | <b>rs12899618</b> | <b><i>THSD4</i></b>    | <b>FEV<sub>1</sub>/FVC</b>                 | <b>rs12102112</b> | <b>71,655,735</b> | <b>1</b>     | <b>3.54E-04</b> | <b>8.39E-01</b> | <b>1.37E-01</b> | <b>rs12441227<br/>(3.38E-09, FEV<sub>1</sub>/FVC;<br/>2.99E-04, FEV<sub>1</sub>)</b> |
| 16        | 56,632,783        | rs12447804*       | <i>MMP15</i>           | FEV <sub>1</sub> /FVC                      | - *               |                   |              | - *             | - *             | - *             |                                                                                      |
| 16        | 73,947,817        | rs2865531         | <i>CFDP1</i>           | FEV <sub>1</sub> /FVC                      | rs12444589        | 75,454,404        | 1            | 1.96E-01        | 7.80E-02        | 3.13E-01        | rs10871308<br>(5.07E-03, FEV <sub>1</sub> )                                          |
| 21        | 34,574,109        | rs9978142         | <i>KCNE2</i>           | FEV <sub>1</sub> /FVC                      | rs10470171        | 35,652,644        | 0.857        | 5.26E-01        | 8.64E-01        | 9.41E-01        | rs2834455<br>(8.53E-03, FEV <sub>1</sub> /FVC)                                       |

\*HapMap linkage disequilibrium data is not available for rs12447804, and therefore, no surrogate marker has been selected for rs12447804.

**Table E6.** 80 SNPs that best predicted FEV<sub>1</sub>/FVC in the Hutterites, sorted by the chromosome location.  $P_{\text{GWAS}}$  is the  $P$ -value from the FEV<sub>1</sub>/FVC GWAS in the Hutterites; Beta (SE) is that of the predictive SNP in the regression model for the 865 Hutterites; and  $P_{\text{GRAIL}}$  is the region's  $P$ -value given by GRAIL.

| SNP        | Chr     | NCBI36 Position | $P_{\text{GWAS}}$ | Beta (SE)      | $P_{\text{GRAIL}}$ | Implicated Gene  |
|------------|---------|-----------------|-------------------|----------------|--------------------|------------------|
| rs6694986  | 1p13.3  | 107631201       | 4.0E-04           | 0.090 (0.049)  | 0.340              | <i>NTNG1</i>     |
| rs17509160 | 1p13.3  | 107656536       | 6.7E-05           | 0.074 (0.077)  | 0.340              | <i>NTNG1</i>     |
| rs1277216  | 1p13.3  | 109160754       | 4.7E-04           | 0.105 (0.048)  | 0.961              | <i>STXBP3</i>    |
| rs6689641  | 1p13.3  | 110521923       | 7.1E-04           | 0.090 (0.051)  | 0.756              | <i>SLC6A17</i>   |
| rs6662186  | 1q23.3  | 163531357       | 1.2E-04           | 0.092 (0.077)  | 0.250              | <i>LMX1A</i>     |
| rs11887626 | 2p16.3  | 47709832        | 1.4E-04           | 0.137 (0.062)  | 0.737              | <i>MSH2</i>      |
| rs702891   | 2p14    | 65611954        | 4.6E-04           | -0.015 (0.049) | 0.242              | <i>SPRED2</i>    |
| rs6733029  | 2p14    | 68287661        | 3.7E-04           | 0.057 (0.046)  | 0.516              | <i>PNO1</i>      |
| rs2707549  | 2q14.3  | 124120027       | 2.3E-04           | 0.040 (0.047)  | N/A                |                  |
| rs6720935  | 2q21.2  | 132882030       | 6.9E-04           | 0.067 (0.050)  | 0.758              | <i>LOC339742</i> |
| rs16823807 | 2q23.3  | 153146906       | 9.2E-05           | 0.044 (0.088)  | 0.489              | <i>FMNL2</i>     |
| rs4342060  | 3q22.3  | 138698510       | 7.6E-04           | 0.050 (0.059)  | 0.363              | <i>SOX14</i>     |
| rs3851374  | 3q26.2  | 170184342       | 7.0E-04           | -0.102 (0.048) | 0.089              | <i>EVI1</i>      |
| rs11922608 | 3q27.3  | 188719180       | 5.4E-04           | 0.090 (0.069)  | 0.482              | <i>SST</i>       |
| rs10517456 | 4p14    | 37631127        | 9.0E-04           | 0.046 (0.051)  | 0.971              | <i>PTTG2</i>     |
| rs1984960  | 4p14    | 37644419        | 3.0E-04           | 0.175 (0.080)  | 0.971              | <i>PTTG2</i>     |
| rs12512633 | 4q28.1  | 124506365       | 5.2E-04           | -0.115 (0.052) | 0.149              | <i>SPRY1</i>     |
| rs6858195  | 4q31.21 | 144909047       | 3.1E-04           | 0.076 (0.046)  | 0.978              | <i>GYPE</i>      |
| rs10045757 | 5p14.2  | 23306226        | 1.0E-03           | 0.094 (0.059)  | 0.423              | <i>LOC391771</i> |
| rs12659895 | 5p14.1  | 27801997        | 6.4E-04           | -0.022 (0.057) | N/A                |                  |
| rs245610   | 5q34    | 162032345       | 8.9E-04           | -0.134 (0.083) | N/A                |                  |
| rs9460984  | 6p22.2  | 24355227        | 5.6E-05           | 0.144 (0.059)  | 0.412              | <i>DCDC2</i>     |
| rs9368881  | 6p21.31 | 35742266        | 3.5E-04           | -0.061 (0.047) | 0.641              | <i>C6orf81</i>   |
| rs4839801  | 6q16.3  | 102353321       | 9.6E-04           | 0.004 (0.052)  | 0.777              | <i>GRIK2</i>     |
| rs1149309  | 6q21    | 105856616       | 4.9E-05           | 0.031 (0.067)  | 0.574              | <i>PREP</i>      |
| rs10872028 | 6q21    | 109420421       | 2.7E-04           | -0.055 (0.060) | 0.256              | <i>ARMC2</i>     |

|            |          |           |         |                |       |           |
|------------|----------|-----------|---------|----------------|-------|-----------|
| rs10872428 | 6q23.3   | 135533565 | 4.4E-04 | 0.207 (0.057)  | 0.324 | MYB       |
| rs9389370  | 6q23.3   | 136472958 | 5.4E-04 | -0.072 (0.044) | 0.620 | PDE7B     |
| rs4092400  | 8p23.2   | 2371110   | 9.9E-04 | 0.065 (0.048)  | 0.616 | MYOM2     |
| rs974120   | 8p23.2   | 2634025   | 3.2E-04 | 0.038 (0.079)  | 0.937 | CSMD1     |
| rs2921026  | 8p23.1   | 8384658   | 6.1E-04 | -0.133 (0.046) | 0.001 | DEFB107A  |
| rs10107668 | 8p12     | 33643721  | 8.0E-04 | 0.038 (0.048)  | 0.208 | DUSP26    |
| rs11779911 | 8p11.21  | 40301135  | 7.0E-04 | -0.173 (0.049) | 0.905 | ZMAT4     |
| rs7001967  | 8q21.13  | 83905913  | 8.1E-04 | 0.189 (0.079)  | N/A   |           |
| rs10955074 | 8q21.3   | 87925578  | 9.6E-04 | -0.045 (0.045) | 0.680 | CNGB3     |
| rs1283720  | 8q23.1   | 108541504 | 5.2E-04 | -0.099 (0.048) | 0.392 | ANGPT1    |
| rs9886419  | 8q24.21  | 129353533 | 7.1E-04 | -0.119 (0.050) | N/A   |           |
| rs10810557 | 9p22.3   | 16326250  | 3.4E-04 | 0.077 (0.044)  | 0.648 | BNC2      |
| rs3843935  | 9p13.3   | 33777871  | 9.0E-04 | 0.029 (0.048)  | 0.573 | PRSS3     |
| rs2306183  | 9q22.31  | 95092000  | 9.7E-04 | -0.118 (0.045) | 0.816 | PHF2      |
| rs10759765 | 9q22.33  | 99347314  | 4.2E-05 | -0.065 (0.048) | 0.261 | TMOD1     |
| rs1570846  | 10q11.21 | 43776486  | 7.1E-04 | -0.139 (0.055) | 0.037 | CXCL12    |
| rs2637261  | 10q22.3  | 77990599  | 7.5E-06 | 0.044 (0.044)  | 0.766 | KCNMA1    |
| rs1010006  | 10q24.2  | 99562286  | 4.5E-04 | 0.051 (0.046)  | 0.662 | ANKRD2    |
| rs7963902  | 12p13.32 | 4988938   | 1.9E-04 | 0.090 (0.043)  | 0.932 | KCNA6     |
| rs3925064  | 12p12.1  | 23985031  | 4.2E-04 | -0.099 (0.048) | 0.271 | SOX5      |
| rs7968811  | 12p12.1  | 24428104  | 2.8E-04 | -0.021 (0.045) | 0.271 | SOX5      |
| rs11050428 | 12p12.1  | 29823051  | 2.2E-04 | -0.112 (0.065) | 0.818 | TMTC1     |
| rs1829717  | 12q21.31 | 80433224  | 7.8E-05 | 0.009 (0.048)  | 0.899 | PPFIA2    |
| rs2056218  | 12q21.31 | 82056671  | 4.5E-04 | 0.147 (0.048)  | 0.903 | TMTC2     |
| rs879703   | 12q22    | 92946123  | 2.4E-04 | 0.049 (0.047)  | 0.467 | CRADD     |
| rs7134063  | 12q23.3  | 106723461 | 4.4E-05 | 0.083 (0.047)  | 0.167 | PWP1      |
| rs2329247  | 13q31.1  | 82160171  | 8.0E-04 | 0.055 (0.077)  | N/A   |           |
| rs9322855  | 14q11.2  | 20223139  | 7.6E-04 | -0.048 (0.046) | 0.171 | RNASE4    |
| rs8016448  | 14q24.3  | 72961640  | 5.9E-04 | -0.071 (0.055) | 0.316 | C14orf169 |
| rs2180080  | 14q32.13 | 93560454  | 7.2E-04 | -0.132 (0.067) | 0.213 | OTUB2     |
| rs2033785  | 15q22.33 | 65228920  | 2.9E-04 | 0.044 (0.057)  | 0.262 | SMAD3     |
| rs11636597 | 15q23    | 68208095  | 1.5E-05 | 0.117 (0.059)  | 0.642 | TLE3      |
| rs12907875 | 15q23    | 68217654  | 4.6E-04 | -0.024 (0.054) | 0.642 | TLE3      |
| rs6494886  | 15q23    | 68720785  | 3.9E-07 | -0.018 (0.098) | 0.557 | UACA      |
| rs1477439  | 15q23    | 68821634  | 5.3E-06 | 0.110 (0.071)  | 0.557 | UACA      |

|            |          |          |         |                |       |                                           |
|------------|----------|----------|---------|----------------|-------|-------------------------------------------|
| rs6494904  | 15q23    | 69396576 | 1.4E-08 | -0.016 (0.069) | 0.739 | <i>THSD4</i>                              |
| rs12592370 | 15q24.1  | 72098742 | 4.5E-04 | -0.027 (0.065) | 0.738 | <i>PML</i>                                |
| rs1550434  | 15q24.1  | 72118264 | 2.0E-05 | -0.067 (0.057) | 0.738 | <i>PML</i>                                |
| rs6495126  | 15q24.1  | 72962079 | 8.0E-04 | -0.060 (0.056) | 0.976 | <i>RPP25</i>                              |
| rs7171364  | 15q25.3  | 83803031 | 3.4E-04 | 0.180 (0.064)  | 0.367 | <i>PDE8A</i>                              |
| rs12919417 | 16q22.3  | 70137212 | 3.2E-04 | 0.043 (0.068)  | 0.345 | <i>KIAA0174</i>                           |
| rs707236   | 16q23.3  | 82360661 | 6.3E-04 | 0.143 (0.045)  | 0.910 | <i>CDH13</i>                              |
| rs4783102  | 16q24.1  | 83535549 | 1.4E-04 | -0.106 (0.054) | 0.687 | <i>USP10</i>                              |
| rs7216399  | 17p11.2  | 16797303 | 6.0E-04 | -0.065 (0.054) | 0.043 | <i>TNFRSF13B</i>                          |
| rs8080953  | 17p11.2  | 19381812 | 1.0E-03 | -0.233 (0.100) | 0.748 | <i>ZNF179</i>                             |
| rs225207   | 17q11.2  | 27918837 | 4.9E-05 | -0.096 (0.065) | 0.980 | <i>MYO1D</i>                              |
| rs8064367  | 17q12    | 29496973 | 9.1E-04 | -0.018 (0.062) | 0.521 | <i>ACCN1</i>                              |
| rs854679   | 17q12    | 31382952 | 3.4E-07 | -0.049 (0.059) | 0.020 | <i>CCL18</i>                              |
| rs2074158  | 17q21.2  | 37510689 | 8.8E-05 | -0.132 (0.083) | 0.486 | <i>HSPB9</i>                              |
| rs16950093 | 17q21.33 | 46995183 | 5.6E-04 | -0.085 (0.054) | 0.205 | <i>UTP18</i>                              |
| rs2017854  | 17q24.2  | 62918483 | 2.6E-06 | -0.097 (0.048) | 0.828 | <i>PITPNC1</i>                            |
| rs365548   | 20p13    | 185618   | 5.6E-04 | 0.003 (0.046)  | 0.001 | <i>DEFB129, RP5-1103G7.6</i>              |
| rs4815436  | 20p11.21 | 25521423 | 9.4E-04 | 0.181 (0.069)  | 0.001 | <i>DEFB115, DEFB116, DEFB123, DEFB124</i> |
| rs2835345  | 21q22.13 | 36723304 | 8.3E-06 | -0.108 (0.055) | 0.900 | <i>CHAF1B</i>                             |

**Figure E1.** Measures of lung function in the Hutterites. Distributions of standardized values of **(a)** FEV<sub>1</sub>, **(b)** FVC and **(c)** FEV<sub>1</sub>/FVC by age and sex (blue, male; orange, female). Correlations between measures of lung function: **(d)** FEV<sub>1</sub> and FVC, **(e)** FEV<sub>1</sub> and FEV<sub>1</sub>/FVC and **(f)** FVC and FEV<sub>1</sub>/FVC. The linear regression line is shown in red.

**Figure E2.** Regional association plots for the three most significant associations in the GWAS of FEV<sub>1</sub>/FVC in the Hutterites: *THSD4-UACA-TLE3* locus on chromosome 15, *CCL23-CCL18* locus on chromosome 17q12, and *C10orf11* locus on chromosome 10q22.3 in the full sample (**a-c, respectively**) and in sub-analyses excluding asthmatics (**d-f, respectively**), *THSD4-UACA-TLE3* locus on chromosome 15, *CCL23-CCL18* locus on chromosome 17q12, and *C10orf11* locus on chromosome 10q22.3 in sub-analysis excluding asthmatics (**d-f**). In each plot the most significantly associated SNP is shown as a large blue diamond. The colors of the other SNPs reflect the linkage disequilibrium with that SNP based on  $r^2$  values in the Hutterites (red,  $r^2 \geq 0.8$ ; orange,  $0.5 \leq r^2 < 0.8$ ; yellow,  $0.2 \leq r^2 < 0.5$ ; white,  $r^2 < 0.2$ ).

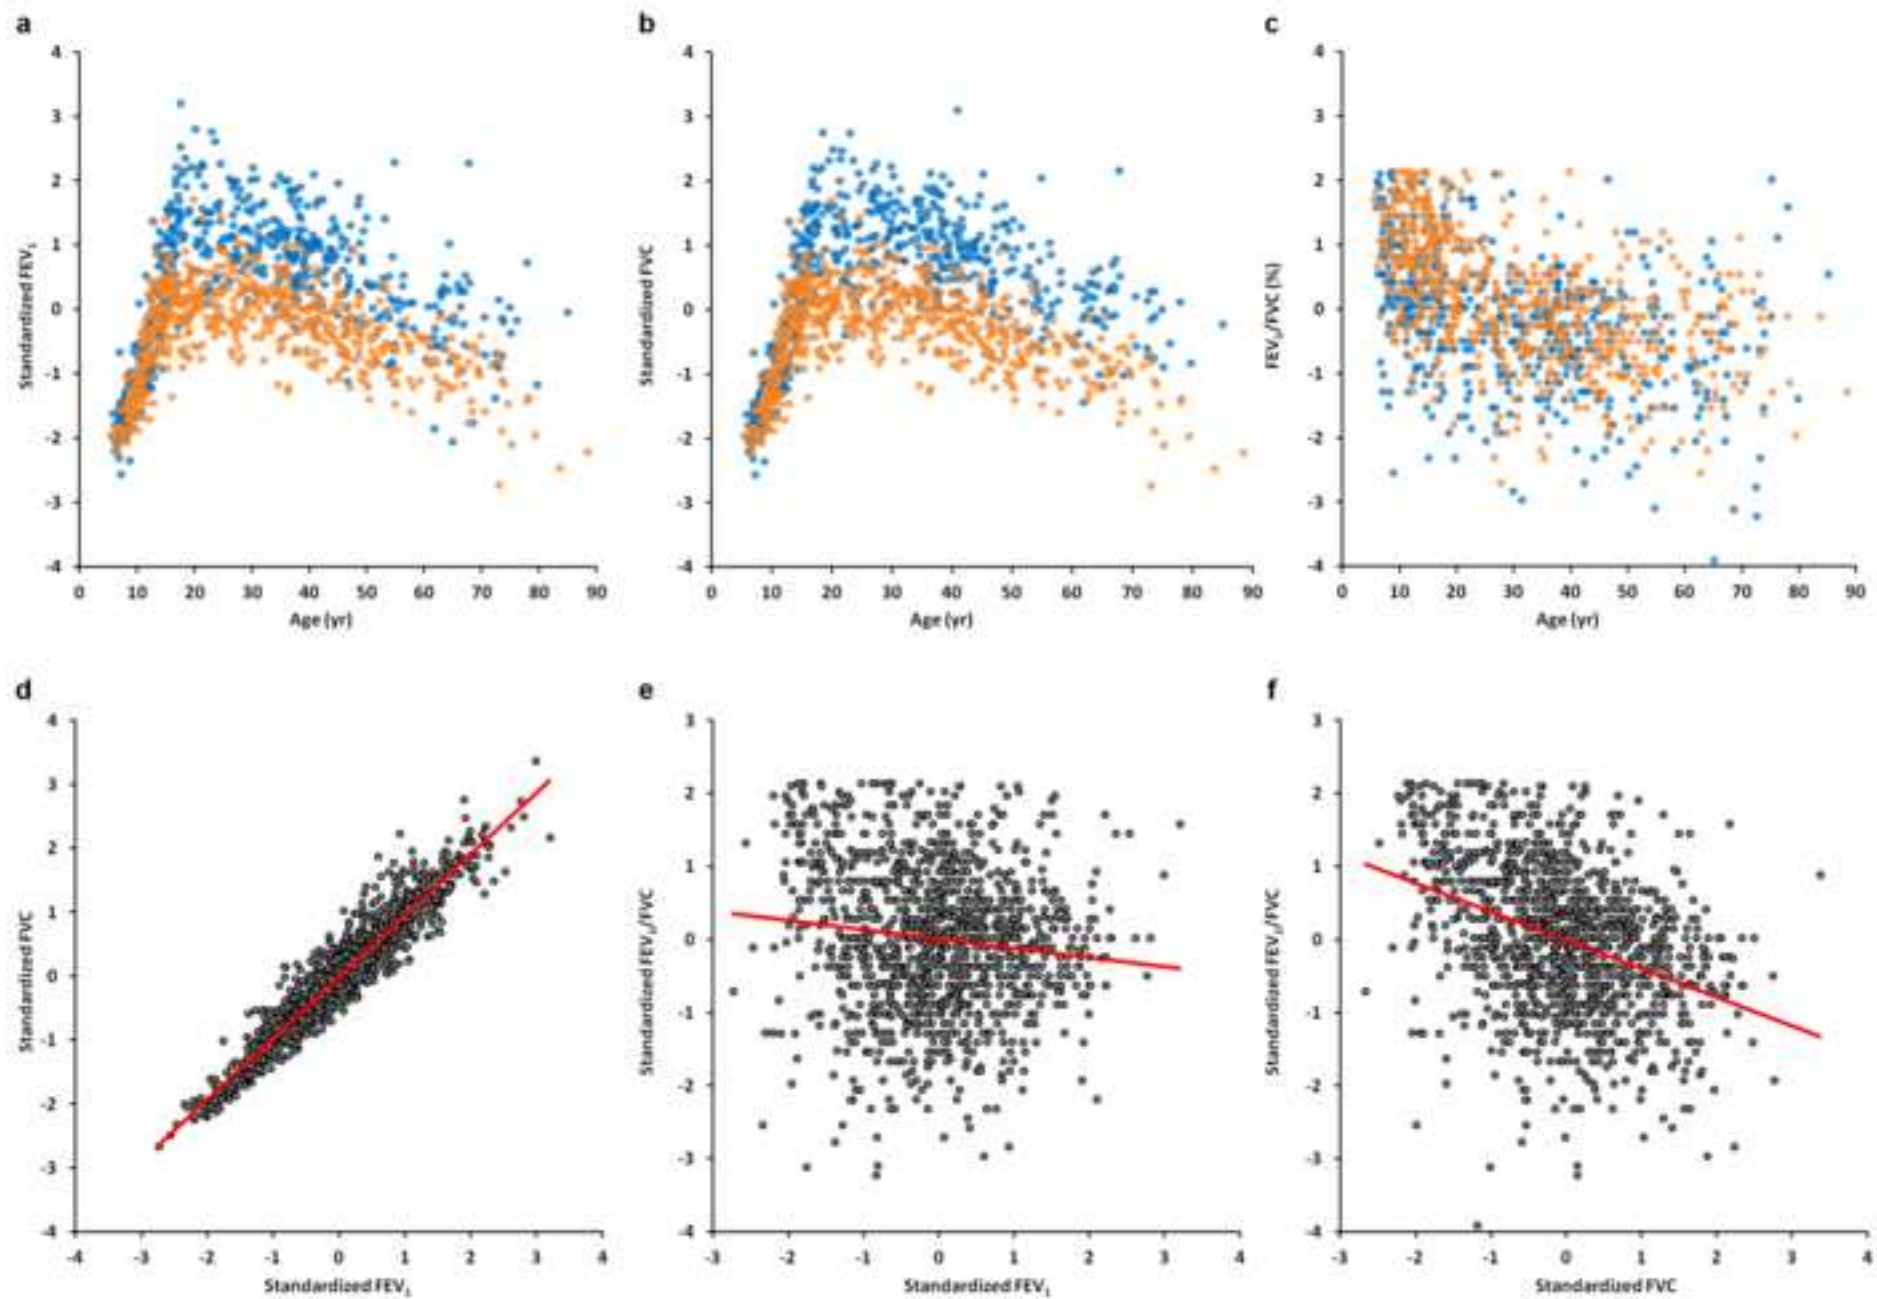



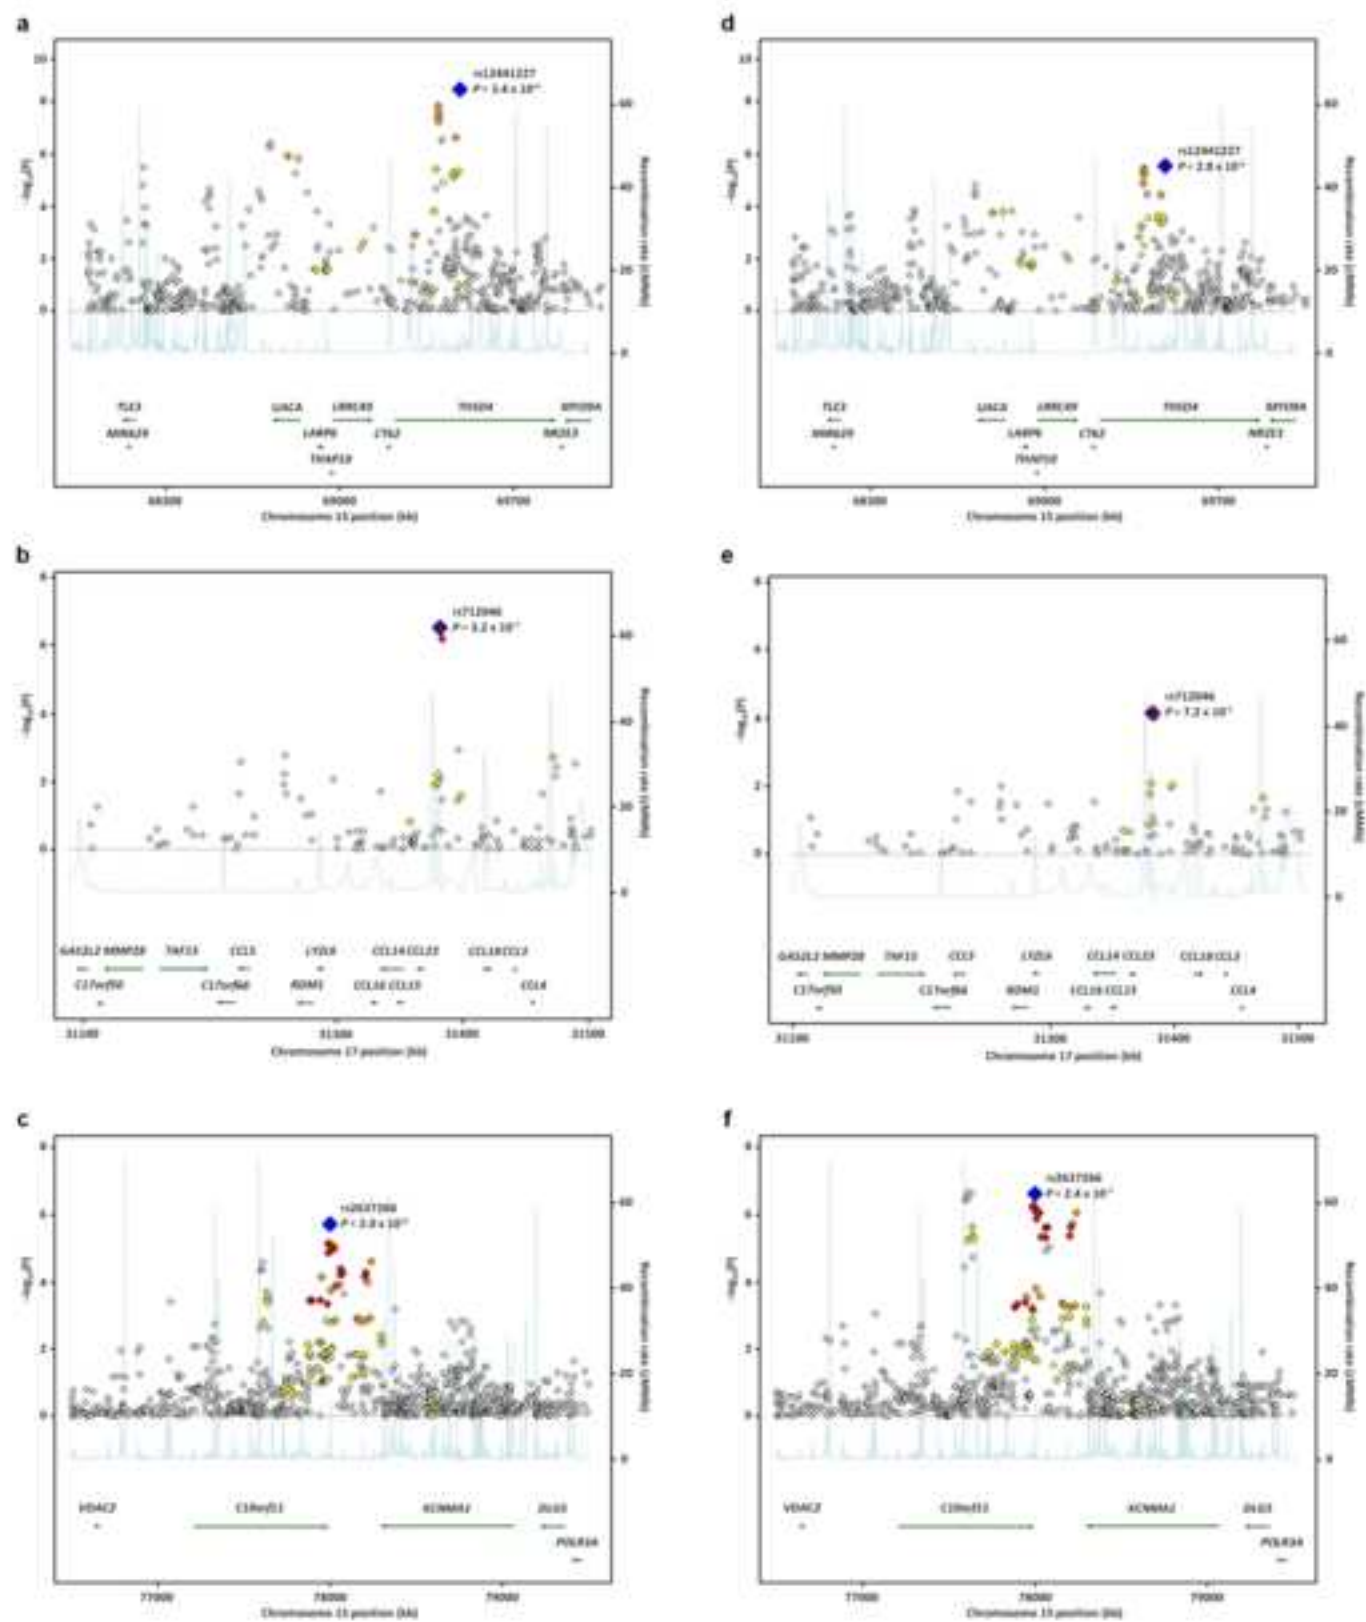

Supplement: NIHMS514437-supplement-supplement_1.pdf [file NIHMS514437-supplement-supplement_1.pdf]
